# Supplementary material for: Plasminogen Alleles Influence Susceptibility to Invasive Aspergillosis
Source: PubMed Central journal article supplement (PMC2423485; doi:10.1371/journal.pgen.1000101), 2008-06-20

Supplementary Figure 1A

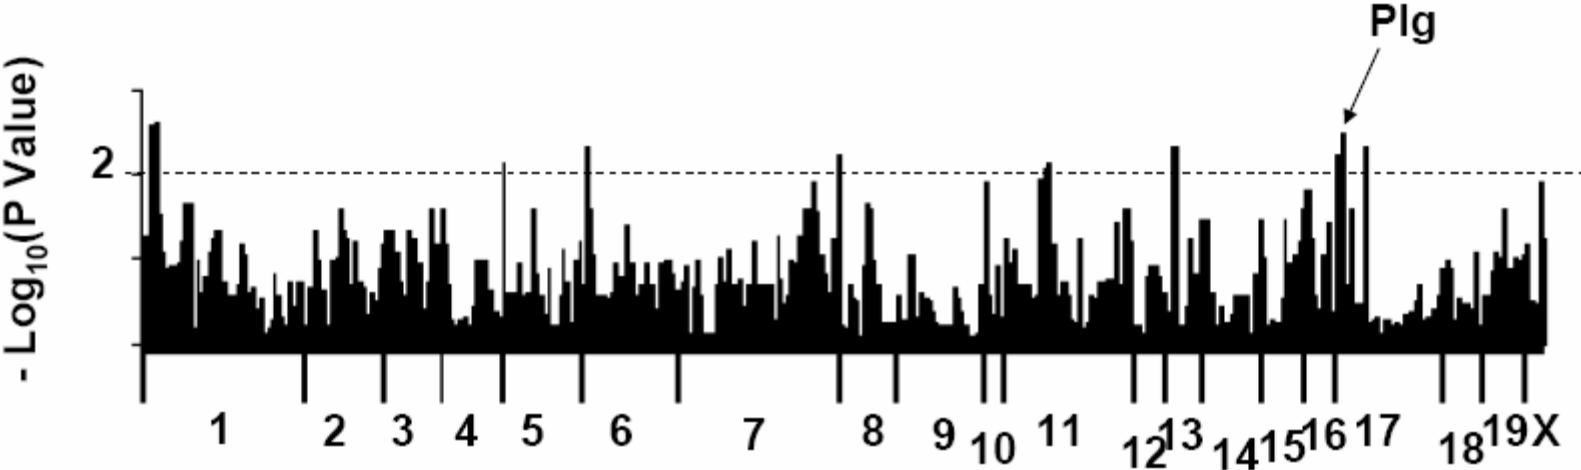

Supplementary Figure 1B

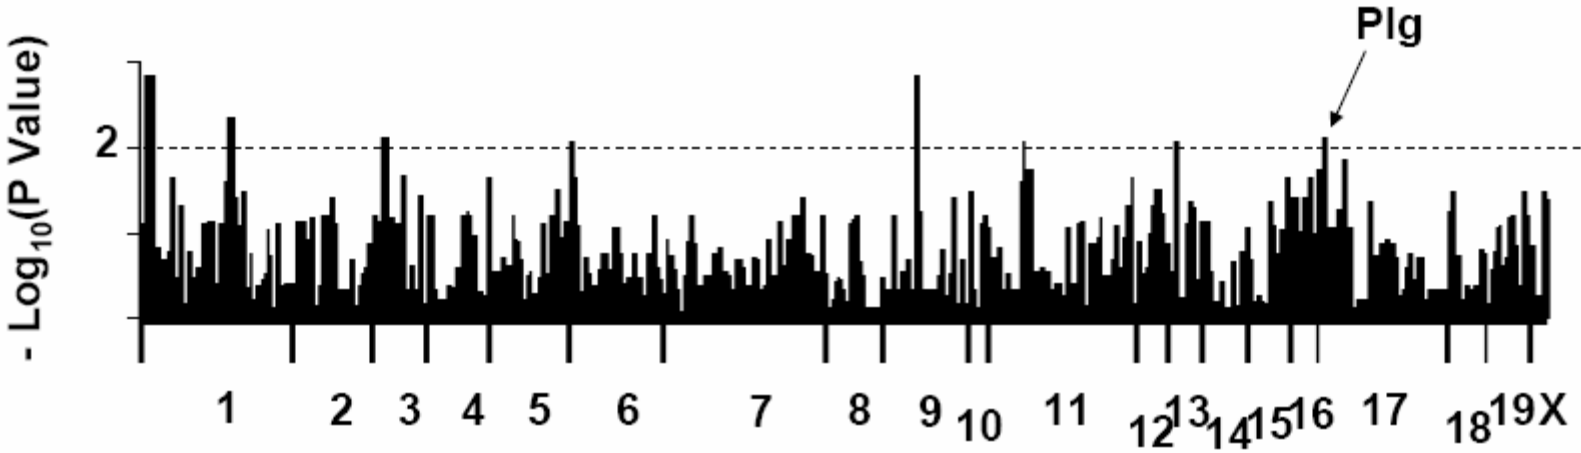

Supplement: pgen.1000101.s001.pdf [file pgen.1000101.s001.pdf]
