# Supplementary material for: Plasminogen Alleles Influence Susceptibility to Invasive Aspergillosis
Source: PubMed Central journal article supplement (PMC2423485; doi:10.1371/journal.pgen.1000101), 2008-06-20
Supplement: pgen.1000101.s002.pdf [file pgen.1000101.s002.pdf]

Supplementary Figure 2

| P-value | Haplotype                                                                         | Chr. | Position (MB) | #SNPs | Symbol   |
|---------|-----------------------------------------------------------------------------------|------|---------------|-------|----------|
| 0.0015  |  | 1    | 36.43~37.55   | 86    | Ugcgl1   |
| 0.0015  |  | 1    | 37.55~37.55   | 8     | Cnga3    |
| 0.0015  |  | 9    | 58.12~58.13   | 12    | Cyp11a1  |
| 0.0048  |  | 1    | 170.89~170.90 | 20    | Fcgr2b   |
| 0.008   |  | 3    | 64.97~64.97   | 23    | Kcnab1   |
| 0.008   |  | 17   | 11.05~11.30   | 26    | Plg      |
| 0.008   |  | 17   | 11.30~11.30   | 4     | Slc22a1  |
| 0.0089  |  | 6    | 50.48~50.49   | 10    | Osbp13   |
| 0.0089  |  | 11   | 56.94~56.95   | 4     | Gria1    |
| 0.0089  |  | 13   | 57.44~57.44   | 10    | nb:Ntrk2 |
