# Supplementary material for: Plasminogen Alleles Influence Susceptibility to Invasive Aspergillosis
Source: PubMed Central journal article supplement (PMC2423485; doi:10.1371/journal.pgen.1000101), 2008-06-20

Supplementary Figure 3:

A.

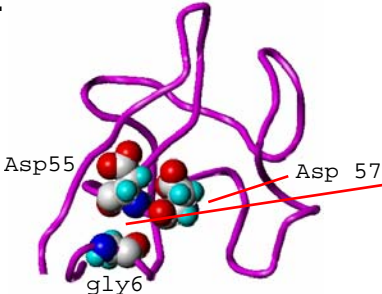

B.

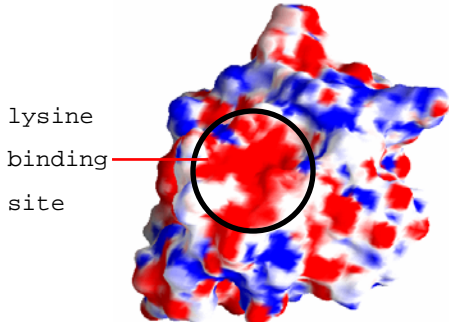

C.

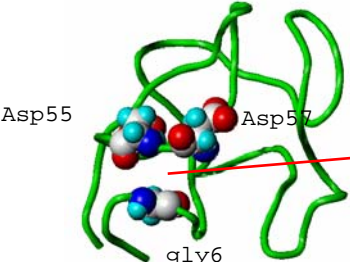

D.

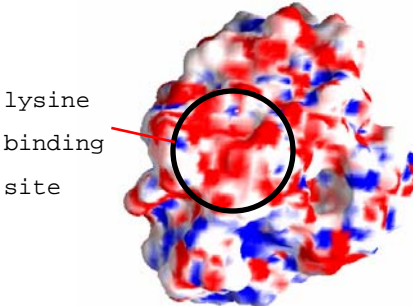

E.

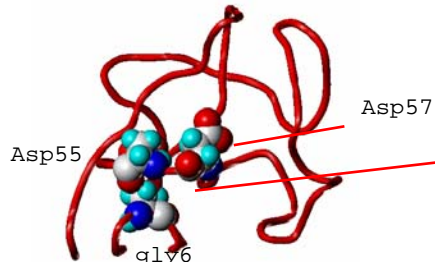

F.

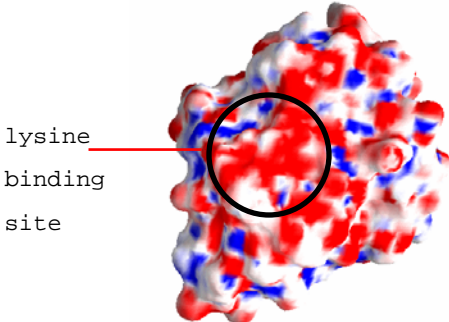

Supplement: pgen.1000101.s003.pdf [file pgen.1000101.s003.pdf]
